# Supplementary material
Source: PubMed Central journal article supplement (PMC5099110)
Supplement: NIHMS793643-supplement-Table.pdf [file NIHMS793643-supplement-Table.pdf]

**Table 1.** Pre-clinical applications of ultrasound molecular imaging

| Application     | Animal model          | Molecular target          | Imaging mode  | Adherent microbubble isolation | Dose (Microbubbles per animal) | Reference |
|-----------------|-----------------------|---------------------------|---------------|--------------------------------|--------------------------------|-----------|
| Angiogenesis    | Mouse, tumor          | VEGFR2                    | B-mode        | Pre-burst minus post-burst     | $3.8 \times 10^7$              | [20]      |
| Angiogenesis    | Mouse, tumor          | VEGFR2, $\alpha_v\beta_3$ | B-mode        | Pre-burst minus post-burst     | $5 \times 10^7$                | [21]      |
| Angiogenesis    | Mouse, tumor          | VEGFR2                    | CPS           | Fast dwell-time based method   | $5 \times 10^7$                | [12]      |
| Angiogenesis    | Mouse, tumor          | E-selectin                | B-mode        | Pre-burst minus post-burst     | $1 \times 10^6$                | [22]      |
| Cancer          | Mouse, mammary glands | VEGFR2                    | CPS           | Pre-burst minus post-burst     | $5 \times 10^7$                | [1]       |
| Cancer          | Mouse, pancreas       | VEGFR2                    | Contrast mode | Pre-burst minus post-burst     | $5 \times 10^7$                | [2]       |
| Inflammation    | Rat, heart            | ICAM-1                    | Contrast mode | Pre-burst minus post-burst     | $2.5 \times 10^6$              | [10]      |
| Inflammation    | Rat, heart            | Selectins                 | CPS           | Pre-burst minus post-burst     | $5 \times 10^6$                | [23]      |
| Inflammation    | Mouse, heart          | P-selectin                | CPS           | Pre-burst minus post-burst     | $1 \times 10^6$                | [3]       |
| Atherosclerosis | Mouse, thoracic aorta | VCAM-1                    | CPS           | Pre-burst minus post-burst     | $1 \times 10^6$                | [4]       |
| Atherosclerosis | Mouse, thoracic aorta | P-selectin, VCAM-1        | CPS           | Pre-burst minus post-burst     | $1 \times 10^6$                | [5]       |

**Table 2.** Overview of microbubble doses used in this study

| Microbubbles per mouse | Mouse body weight (g) | Microbubbles per mouse body weight (g) | Phosphatidylcholine (ng) per mouse body weight (g) |
|------------------------|-----------------------|----------------------------------------|----------------------------------------------------|
| $5 \times 10^4$        | $28.3 \pm 1.4$        | $(1.7 \pm 0.1) \times 10^3$            | $(5.3 \pm 0.1) \times 10^{-2}$                     |
| $2 \times 10^5$        | $28.6 \pm 1.9$        | $(7.0 \pm 0.4) \times 10^3$            | $(2.1 \pm 0.1) \times 10^{-1}$                     |
| $1 \times 10^7$        | $29.7 \pm 1.8$        | $(3.4 \pm 0.2) \times 10^5$            | $(1.0 \pm 0.1) \times 10^1$                        |
